# Supplementary material
Source: MDPI journal article supplement (https://www.mdpi.com/2071-1050/14/4/1997)
Supplement: s1 [file s1]

## Article

# Impact of Nitrogen Application Rates on Upland Rice Performance, Planted under Varying Sowing Times

Tajamul Hussain <sup>1</sup>, Nurda Hussain <sup>1</sup>, Mukhtar Ahmed <sup>2</sup>, Charassri Nualsri <sup>3</sup> and Saowapa Duangpan <sup>1,\*</sup>

\* Correspondence: saowapa.d@psu.ac.th; Tel.: +66–74–286–138

## Supplementary Table S1

**Table S1.** Mean squares of ANOVA of yield and yield attributes of Dawk Pa–yawm, straw N uptake, grain N uptake, total N uptake and water use efficiency during 2018–19.

| SOV   | df | DF                    | DM                    | PH                     | NT                  | NP                  | GY                   | BM                    | SNU                 | GNU                 | TNU                 | WUE                  |
|-------|----|-----------------------|-----------------------|------------------------|---------------------|---------------------|----------------------|-----------------------|---------------------|---------------------|---------------------|----------------------|
| NR    | 3  | 0.88 <sup>ns</sup>    | 2.44 <sup>ns</sup>    | 738.56 <sup>***</sup>  | 8.54 <sup>***</sup> | 7.89 <sup>***</sup> | 13.07 <sup>***</sup> | 330.79 <sup>***</sup> | 1.37 <sup>***</sup> | 0.01 <sup>***</sup> | 2.14 <sup>***</sup> | 0.003 <sup>***</sup> |
| ST    | 2  | 286.36 <sup>***</sup> | 255.86 <sup>***</sup> | 1002.69 <sup>***</sup> | 3.69 <sup>**</sup>  | 3.58 <sup>**</sup>  | 11.04 <sup>***</sup> | 24.38 <sup>**</sup>   | 0.13 <sup>***</sup> | 0.05 <sup>***</sup> | 0.03 <sup>ns</sup>  | 0.001 <sup>**</sup>  |
| NR×ST | 6  | 2.81 <sup>ns</sup>    | 0.08 <sup>ns</sup>    | 26.14 <sup>ns</sup>    | 0.21 <sup>ns</sup>  | 0.14 <sup>ns</sup>  | 0.52 <sup>ns</sup>   | 2.29 <sup>ns</sup>    | 0.06 <sup>***</sup> | 0.01 <sup>***</sup> | 0.04 <sup>*</sup>   | 0.0001 <sup>ns</sup> |
| Error | 24 | 2.47                  | 1.83                  | 37.64                  | 0.44                | 0.39                | 0.45                 | 3.60                  | 0.009               | 0.001               | 0.009               | 0.0001               |
| CV %  |    | 1.40                  | 1.02                  | 5.83                   | 12.06               | 11.34               | 13.80                | 9.76                  | 12.10               | 12.78               | 9.07                | 12.80                |

SOV= Source of variation, df = degree of freedom, NR = Nitrogen application rate, ST = Sowing time, DF = Days to flowering, DM = Days to maturity, PH = Plant height, NT = Number of tillers, NP = Number of panicles, GY = Grain yield, BM = biomass, SNU = Straw nitrogen uptake, GNU = Grain nitrogen uptake, TNU = Total nitrogen uptake, WUE = Water use efficiency, \*\*\* = Highly significant ( $p < 0.001$ ), \*\* = Moderately significant ( $p < 0.01$ ), \* Significant ( $p < 0.05$ ), ns = non-significant

## Supplementary Table S2

**Table S2.** Mean squares of ANOVA of yield and yield attributes of Dawk Pa–yawm, straw N uptake, grain N up-take, total N uptake and water use efficiency during 2019–20.

| SOV   | df | DF                     | DM                    | PH                     | NT                  | NP                 | GY                   | BM                    | SNU                  | GNU                  | TNU                  | WUE                  |
|-------|----|------------------------|-----------------------|------------------------|---------------------|--------------------|----------------------|-----------------------|----------------------|----------------------|----------------------|----------------------|
| NR    | 3  | 1.07 <sup>ns</sup>     | 7.66 <sup>ns</sup>    | 452.32 <sup>***</sup>  | 10.11 <sup>**</sup> | 9.14 <sup>**</sup> | 13.52 <sup>***</sup> | 143.18 <sup>***</sup> | 0.821 <sup>***</sup> | 0.057 <sup>***</sup> | 1.281 <sup>***</sup> | 0.030 <sup>***</sup> |
| ST    | 2  | 1177.53 <sup>***</sup> | 166.08 <sup>***</sup> | 5466.03 <sup>***</sup> | 8.44 <sup>*</sup>   | 5.86 <sup>*</sup>  | 20.93 <sup>***</sup> | 71.57 <sup>**</sup>   | 0.491 <sup>***</sup> | 0.033 <sup>***</sup> | 0.663 <sup>***</sup> | 0.090 <sup>***</sup> |
| NR×ST | 6  | 3.38 <sup>ns</sup>     | 3.60 <sup>ns</sup>    | 91.77 <sup>**</sup>    | 0.67 <sup>ns</sup>  | 0.42 <sup>ns</sup> | 1.81 <sup>ns</sup>   | 3.59 <sup>ns</sup>    | 0.090 <sup>*</sup>   | 0.004 <sup>ns</sup>  | 0.097 <sup>ns</sup>  | 0.005 <sup>*</sup>   |
| Error | 24 | 2.47                   | 2.67                  | 24.42                  | 1.72                | 1.25               | 0.84                 | 9.81                  | 0.031                | 0.002                | 0.042                | 0.001                |
| CV %  |    | 1.44                   | 1.28                  | 4.76                   | 23.39               | 21.52              | 18.36                | 18.27                 | 22.04                | 18.16                | 19.58                | 15.73                |

SOV= Source of variation, df = degree of freedom, NR = Nitrogen application rate, ST = Sowing time, DF = Days to flowering, DM = Days to maturity, PH = Plant height, NT = Number of tillers, NP = Number of panicles, GY = Grain yield, BM = biomass, SNU = Straw nitrogen uptake, GNU = Grain nitrogen uptake, TNU = Total nitrogen uptake, WUE = Water use efficiency, \*\*\* = Highly significant ( $p < 0.001$ ), \*\* = Moderately significant ( $p < 0.01$ ), \* Significant ( $p < 0.05$ ), ns = non-significant.

## Supplementary Figure S1

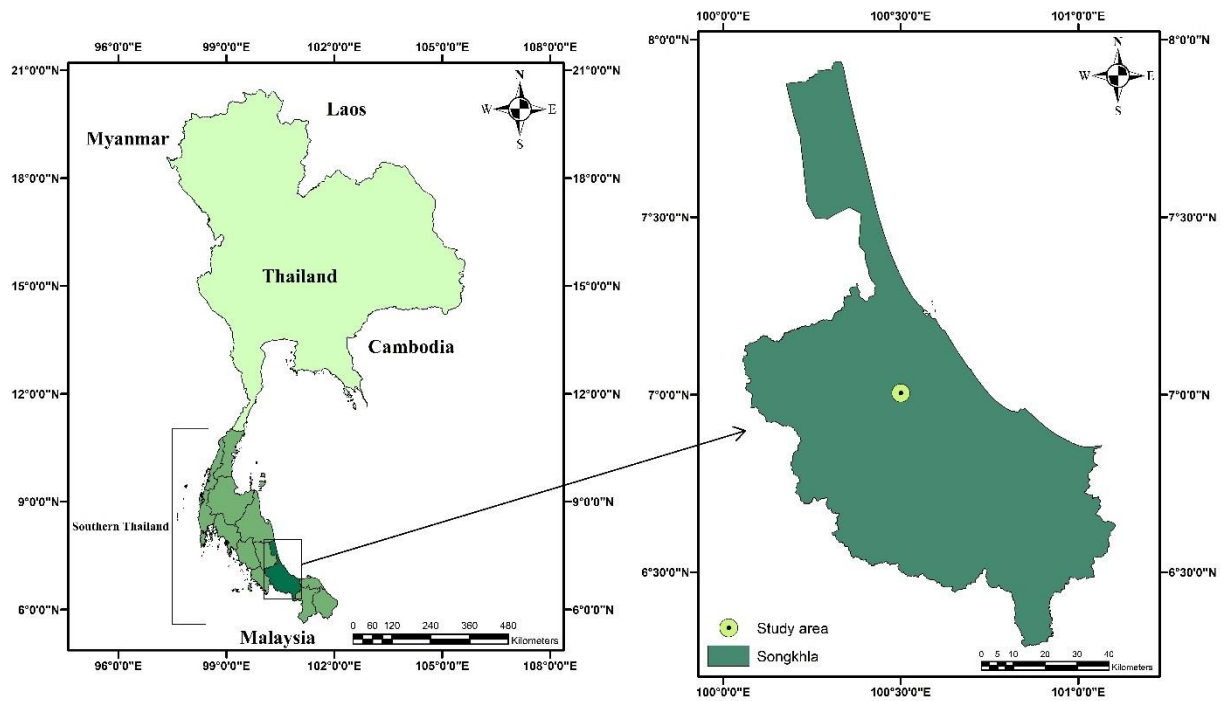

**Figure S1.** Study area at Prince of Songkla University, Songkhla in Southern Thailand (Source: adapted from ArcGIS:v10.5).
